# Supplementary material for: Factors controlling spatiotemporal variability of soil carbon accumulation and stock estimates in a tidal salt marsh
Source: Copernicus journal article supplement (doi:10.5194/bg-21-2367-2024), 2024-05-16
Supplement: Supplementary file 1 [file bg-21-2367-2024-supplement.pdf]

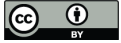

*Supplement of*

## **Factors controlling spatiotemporal variability of soil carbon accumulation and stock estimates in a tidal salt marsh**

**Sean Fettrow et al.**

*Correspondence to:* Angelia L. Seyfferth ([angelias@udel.edu](mailto:angelias@udel.edu))

The copyright of individual parts of the supplement might differ from the article licence.

**Table S1** The indices and peaks for UV-VIS/ EMMs analysis used in this study to determine molecular properties and source of DOC

| <b>Indices</b>                 | <b>Calculation</b>                                                                               | <b>Characterization Information</b>                                                | <b>Original Source</b> |
|--------------------------------|--------------------------------------------------------------------------------------------------|------------------------------------------------------------------------------------|------------------------|
| Abs <sub>254</sub>             | Absorption at 254 nm                                                                             | Related to total CDOM concentration                                                |                        |
| SUVA <sub>254</sub>            | Absorption at 254 nm divide by DOC concentration                                                 | Higher number is associated with greater aromaticity                               | Weishaar et al. 2003   |
| S <sub>r</sub>                 | Slope from S <sub>275-295</sub> divided by slope from S <sub>350-400</sub>                       | Higher values indicate marine influence                                            | Helms et al. (2008)    |
| E <sub>2</sub> :E <sub>3</sub> | Slope from S <sub>250-365</sub>                                                                  | Inversely related to DOM molecular weight                                          | Helms et al. (2008)    |
| Coble A                        | Ex260/ Em450                                                                                     | Terrestrial-like source, soil-humics                                               | Cory et al 2010        |
| Coble C                        | Ex340/ em450                                                                                     | Terrestrial-like source, soil-humics                                               | Baker et al 2008       |
| HIX                            | Area under em spectra from 435-480 m, divided by peak area 300-345 nm & 435-480 nm, at ex 254 nm | Higher values correspond with increased humic substances or degree of humification | Ohno (2002)            |
| BIX                            | Ratio of em intensity at 380 nm divided by 430 nm at excitation 310 nm                           | Higher values correspond with microbially-derived CDOM                             | Huguet et al 2009      |

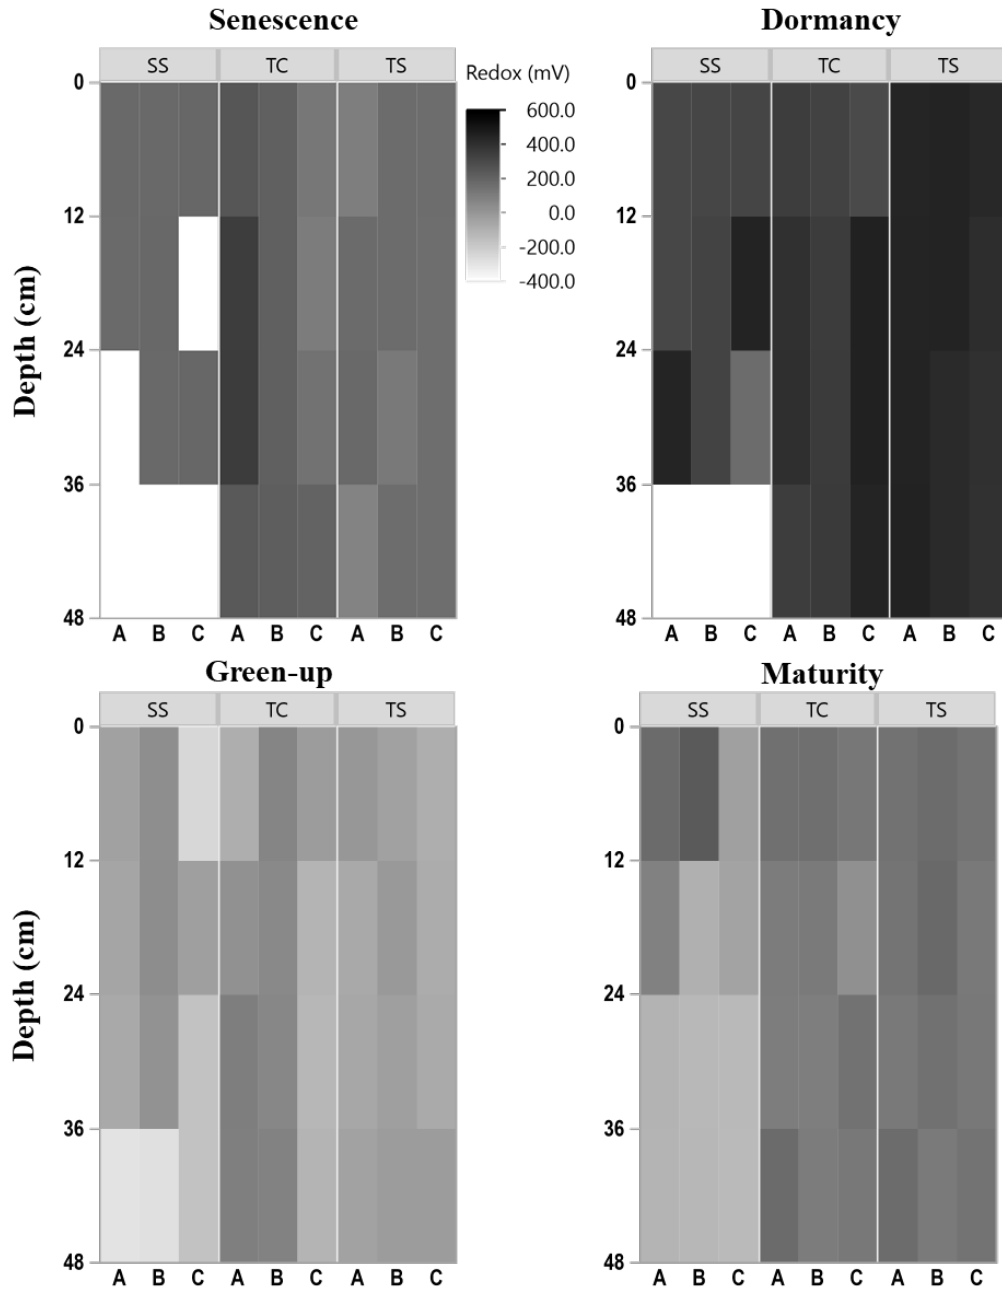

**Figure S1** Heat maps of porewater redox with depth at the three subsites (SS, TC, and TS), four phenology phases, and for each replicate core (A (closest to channel), B, and C (farthest from channel)). No measurement was able to be obtained for some 12-cm sections as shown by white rectangles.

**Table S2.** ANOVA and post-hoc Tukey results for all assessed soil and porewater biogeochemical variables. Mean values represent average values for each depth for subsamples from all subsites and phenophases. The mean is reported ( $\pm$  SD) along with a connecting letter report. Means with letters that do not connect are differ are significantly ( $p < 0.05$ ) different.

| <b>Variable</b>             | <b>0-12 cm</b>                   | <b>12-24 cm</b>                 | <b>24-36 cm</b>                 | <b>36-48 cm</b>                |
|-----------------------------|----------------------------------|---------------------------------|---------------------------------|--------------------------------|
| <b>Soil C (%)</b>           | 6.0 ( $\pm 1.6$ ) <sup>A</sup>   | 6.0 ( $\pm 1.7$ ) <sup>A</sup>  | 5.9 ( $\pm 1.7$ ) <sup>A</sup>  | 5.9 ( $\pm 1.9$ ) <sup>A</sup> |
| <b>Soil S (%)</b>           | 1.0 ( $\pm 0.6$ ) <sup>A</sup>   | 1.4 ( $\pm 0.9$ ) <sup>AB</sup> | 1.5 ( $\pm 0.6$ ) <sup>AB</sup> | 1.7 ( $\pm 0.6$ ) <sup>B</sup> |
| <b>DOC (mM)</b>             | 18.9 ( $\pm 32.7$ ) <sup>A</sup> | 6.1 (4.4) <sup>AB</sup>         | 5.2 (4.4) <sup>B</sup>          | 14.2 (31.9) <sup>AB</sup>      |
| <b>Redox (mV)</b>           | 188( $\pm 191$ ) <sup>A</sup>    | 180 ( $\pm 197$ ) <sup>A</sup>  | 160 ( $\pm 203$ ) <sup>A</sup>  | 123 ( $\pm 222$ ) <sup>A</sup> |
| <b>pH</b>                   | 8.0 ( $\pm 0.7$ ) <sup>A</sup>   | 8.1 ( $\pm 0.7$ ) <sup>A</sup>  | 8.1 ( $\pm 0.7$ ) <sup>A</sup>  | 8.2 ( $\pm 0.7$ ) <sup>A</sup> |
| <b>Fe<sup>2+</sup> (mM)</b> | 0.3 ( $\pm 0.3$ ) <sup>A</sup>   | 0.3 ( $\pm 0.3$ ) <sup>A</sup>  | 0.2 ( $\pm 0.3$ ) <sup>A</sup>  | 0.2 ( $\pm 0.2$ ) <sup>A</sup> |
| <b>Sulfide (mM)</b>         | 0.2 ( $\pm 0.2$ ) <sup>A</sup>   | 0.3 ( $\pm 0.3$ ) <sup>A</sup>  | 0.3 ( $\pm 0.4$ ) <sup>A</sup>  | 0.4 ( $\pm 0.4$ ) <sup>A</sup> |
| <b>Salinity (ppt)</b>       | 10 ( $\pm 4.1$ ) <sup>A</sup>    | 10 ( $\pm 2.4$ ) <sup>A</sup>   | 10 ( $\pm 2.4$ ) <sup>A</sup>   | 10 ( $\pm 2.0$ ) <sup>A</sup>  |
| <b>Total Fe (mM)</b>        | 0.2 ( $\pm 0.2$ ) <sup>A</sup>   | 0.3 ( $\pm 0.3$ ) <sup>AB</sup> | 0.2 (0.2) <sup>AB</sup>         | 0.1 (0.1) <sup>B</sup>         |
| <b>Total Ca (mM)</b>        | 5.2 ( $\pm 1.6$ ) <sup>A</sup>   | 5.2 ( $\pm 1.2$ ) <sup>A</sup>  | 5.2 ( $\pm 1.1$ ) <sup>A</sup>  | 5.4 ( $\pm 0.7$ ) <sup>A</sup> |
